# Supplementary material for: Reliability of Mental Workload Index Assessed by EEG with Different Electrode Configurations and Signal Pre-Processing Pipelines
Source: MDPI journal article supplement (doi:10.3390/s23031367), 2023-01-26
Supplement: s1 [file s1]

**Table S1.** Summary of the descriptive statistical features of the MWL index assessed for each group (n=13) at different pre-processing pipelines, electrode configurations and task blocks. Mad refers to median absolute deviation; SD refers to standard deviation.

| Pipeline     | Configuration  | Task   | Median | Mad   | Mean  | SD    |
|--------------|----------------|--------|--------|-------|-------|-------|
| FILT         | Cz             | Task_1 | 0.443  | 0.549 | 0.585 | 0.599 |
| FILT         | Cz             | Task_2 | 0.237  | 0.304 | 0.409 | 0.537 |
| FILT         | Cz             | Task_3 | 0.255  | 0.386 | 0.409 | 0.619 |
| FILT         | Frontoparietal | Task_1 | 0.553  | 0.509 | 0.906 | 0.948 |
| FILT         | Frontoparietal | Task_2 | 0.268  | 0.215 | 0.728 | 0.967 |
| FILT         | Frontoparietal | Task_3 | 0.335  | 0.356 | 0.613 | 0.783 |
| FILT         | FzPz           | Task_1 | 0.747  | 0.599 | 1.107 | 1.074 |
| FILT         | FzPz           | Task_2 | 0.521  | 0.436 | 0.882 | 0.964 |
| FILT         | FzPz           | Task_3 | 0.44   | 0.687 | 0.837 | 0.953 |
| FILT+ASR     | Cz             | Task_1 | 0.192  | 0.158 | 0.481 | 0.618 |
| FILT+ASR     | Cz             | Task_2 | 0.105  | 0.214 | 0.253 | 0.41  |
| FILT+ASR     | Cz             | Task_3 | 0.073  | 0.273 | 0.211 | 0.458 |
| FILT+ASR     | Frontoparietal | Task_1 | 0.291  | 0.407 | 0.645 | 0.769 |
| FILT+ASR     | Frontoparietal | Task_2 | 0.241  | 0.323 | 0.423 | 0.61  |
| FILT+ASR     | Frontoparietal | Task_3 | 0.166  | 0.392 | 0.329 | 0.639 |
| FILT+ASR     | FzPz           | Task_1 | 0.702  | 0.648 | 0.876 | 0.977 |
| FILT+ASR     | FzPz           | Task_2 | 0.348  | 0.478 | 0.611 | 0.821 |
| FILT+ASR     | FzPz           | Task_3 | 0.32   | 0.301 | 0.518 | 0.823 |
| FILT+ASR+ICA | Cz             | Task_1 | 0.232  | 0.207 | 0.493 | 0.61  |
| FILT+ASR+ICA | Cz             | Task_2 | 0.104  | 0.232 | 0.26  | 0.391 |
| FILT+ASR+ICA | Cz             | Task_3 | 0.13   | 0.307 | 0.213 | 0.443 |
| FILT+ASR+ICA | Frontoparietal | Task_1 | 0.469  | 0.377 | 0.665 | 0.672 |
| FILT+ASR+ICA | Frontoparietal | Task_2 | 0.257  | 0.216 | 0.453 | 0.558 |
| FILT+ASR+ICA | Frontoparietal | Task_3 | 0.268  | 0.468 | 0.365 | 0.563 |
| FILT+ASR+ICA | FzPz           | Task_1 | 0.559  | 0.464 | 0.851 | 0.775 |
| FILT+ASR+ICA | FzPz           | Task_2 | 0.411  | 0.353 | 0.579 | 0.591 |
| FILT+ASR+ICA | FzPz           | Task_3 | 0.303  | 0.333 | 0.492 | 0.636 |
| FILT+ICA     | Cz             | Task_1 | 0.168  | 0.132 | 0.427 | 0.527 |
| FILT+ICA     | Cz             | Task_2 | 0.103  | 0.228 | 0.217 | 0.348 |
| FILT+ICA     | Cz             | Task_3 | 0.118  | 0.325 | 0.175 | 0.425 |
| FILT+ICA     | Frontoparietal | Task_1 | 0.48   | 0.421 | 0.797 | 0.841 |
| FILT+ICA     | Frontoparietal | Task_2 | 0.272  | 0.265 | 0.569 | 0.732 |
| FILT+ICA     | Frontoparietal | Task_3 | 0.178  | 0.292 | 0.466 | 0.611 |
| FILT+ICA     | FzPz           | Task_1 | 0.467  | 0.655 | 0.825 | 0.829 |
| FILT+ICA     | FzPz           | Task_2 | 0.357  | 0.301 | 0.582 | 0.648 |
| FILT+ICA     | FzPz           | Task_3 | 0.259  | 0.276 | 0.515 | 0.674 |

**Table S2.** Summary of between groups pairwise t-test comparisons of MWL indexes at different pre-processing pipelines and electrode configurations. P-values (p), p-values adjusted for multiple comparisons (p adjusted) and effect size are listed.

| Pipeline     | Configuration  | Groups Comparison |    |        | p     | p adjusted | Effect size |
|--------------|----------------|-------------------|----|--------|-------|------------|-------------|
| FILT         | Cz             | BL                | vs | Task_1 | 0.004 | 0.025*     | -5.85E-01   |
| FILT         | Cz             | BL                | vs | Task_2 | 0.018 | 0.053      | -4.09E-01   |
| FILT         | Cz             | BL                | vs | Task_3 | 0.035 | 0.07       | -4.09E-01   |
| FILT         | Cz             | Task_1            | vs | Task_2 | 0.087 | 0.131      | 1.76E-01    |
| FILT         | Cz             | Task_1            | vs | Task_3 | 0.135 | 0.162      | 1.76E-01    |
| FILT         | Cz             | Task_2            | vs | Task_3 | 0.989 | 0.989      | 7.57E-04    |
| FILT+ASR     | Cz             | BL                | vs | Task_1 | 0.016 | 0.044*     | -4.81E-01   |
| FILT+ASR     | Cz             | BL                | vs | Task_2 | 0.046 | 0.069      | -2.53E-01   |
| FILT+ASR     | Cz             | BL                | vs | Task_3 | 0.122 | 0.146      | -2.11E-01   |
| FILT+ASR     | Cz             | Task_1            | vs | Task_2 | 0.022 | 0.044*     | 2.28E-01    |
| FILT+ASR     | Cz             | Task_1            | vs | Task_3 | 0.01  | 0.044*     | 2.70E-01    |
| FILT+ASR     | Cz             | Task_2            | vs | Task_3 | 0.321 | 0.321      | 4.20E-02    |
| FILT+ASR+ICA | Cz             | BL                | vs | Task_1 | 0.013 | 0.039*     | -4.93E-01   |
| FILT+ASR+ICA | Cz             | BL                | vs | Task_2 | 0.034 | 0.051      | -2.60E-01   |
| FILT+ASR+ICA | Cz             | BL                | vs | Task_3 | 0.108 | 0.13       | -2.13E-01   |
| FILT+ASR+ICA | Cz             | Task_1            | vs | Task_2 | 0.021 | 0.043*     | 2.34E-01    |
| FILT+ASR+ICA | Cz             | Task_1            | vs | Task_3 | 0.009 | 0.039*     | 2.80E-01    |
| FILT+ASR+ICA | Cz             | Task_2            | vs | Task_3 | 0.277 | 0.277      | 4.66E-02    |
| FILT+ICA     | Cz             | BL                | vs | Task_1 | 0.013 | 0.038*     | -4.27E-01   |
| FILT+ICA     | Cz             | BL                | vs | Task_2 | 0.044 | 0.067      | -2.17E-01   |
| FILT+ICA     | Cz             | BL                | vs | Task_3 | 0.162 | 0.194      | -1.75E-01   |
| FILT+ICA     | Cz             | Task_1            | vs | Task_2 | 0.02  | 0.039*     | 2.11E-01    |
| FILT+ICA     | Cz             | Task_1            | vs | Task_3 | 0.01  | 0.038*     | 2.52E-01    |
| FILT+ICA     | Cz             | Task_2            | vs | Task_3 | 0.352 | 0.352      | 4.14E-02    |
| FILT         | Frontoparietal | BL                | vs | Task_1 | 0.005 | 0.029*     | -9.06E-01   |
| FILT         | Frontoparietal | BL                | vs | Task_2 | 0.019 | 0.032*     | -7.28E-01   |
| FILT         | Frontoparietal | BL                | vs | Task_3 | 0.015 | 0.032*     | -6.13E-01   |
| FILT         | Frontoparietal | Task_1            | vs | Task_2 | 0.052 | 0.063      | 1.78E-01    |
| FILT         | Frontoparietal | Task_1            | vs | Task_3 | 0.022 | 0.032*     | 2.93E-01    |
| FILT         | Frontoparietal | Task_2            | vs | Task_3 | 0.229 | 0.229      | 1.15E-01    |
| FILT+ASR     | Frontoparietal | BL                | vs | Task_1 | 0.011 | 0.021*     | -6.45E-01   |
| FILT+ASR     | Frontoparietal | BL                | vs | Task_2 | 0.028 | 0.042*     | -4.23E-01   |
| FILT+ASR     | Frontoparietal | BL                | vs | Task_3 | 0.088 | 0.105      | -3.29E-01   |
| FILT+ASR     | Frontoparietal | Task_1            | vs | Task_2 | 0.01  | 0.021*     | 2.21E-01    |
| FILT+ASR     | Frontoparietal | Task_1            | vs | Task_3 | 0.004 | 0.021*     | 3.15E-01    |
| FILT+ASR     | Frontoparietal | Task_2            | vs | Task_3 | 0.117 | 0.117      | 9.40E-02    |
| FILT+ASR+ICA | Frontoparietal | BL                | vs | Task_1 | 0.004 | 0.01**     | -6.65E-01   |
| FILT+ASR+ICA | Frontoparietal | BL                | vs | Task_2 | 0.013 | 0.019*     | -4.53E-01   |
| FILT+ASR+ICA | Frontoparietal | BL                | vs | Task_3 | 0.038 | 0.045*     | -3.65E-01   |

|              |                |        |    |        |       |        |           |
|--------------|----------------|--------|----|--------|-------|--------|-----------|
| FILT+ASR+ICA | Frontoparietal | Task_1 | vs | Task_2 | 0.005 | 0.01** | 2.12E-01  |
| FILT+ASR+ICA | Frontoparietal | Task_1 | vs | Task_3 | 0.004 | 0.01** | 3.00E-01  |
| FILT+ASR+ICA | Frontoparietal | Task_2 | vs | Task_3 | 0.137 | 0.137  | 8.77E-02  |
| FILT+ICA     | Frontoparietal | BL     | vs | Task_1 | 0.005 | 0.01*  | -7.97E-01 |
| FILT+ICA     | Frontoparietal | BL     | vs | Task_2 | 0.016 | 0.021* | -5.69E-01 |
| FILT+ICA     | Frontoparietal | BL     | vs | Task_3 | 0.018 | 0.021* | -4.66E-01 |
| FILT+ICA     | Frontoparietal | Task_1 | vs | Task_2 | 0.004 | 0.01*  | 2.28E-01  |
| FILT+ICA     | Frontoparietal | Task_1 | vs | Task_3 | 0.004 | 0.01*  | 3.31E-01  |
| FILT+ICA     | Frontoparietal | Task_2 | vs | Task_3 | 0.147 | 0.147  | 1.03E-01  |
| FILT         | FzPz           | BL     | vs | Task_1 | 0.003 | 0.016* | -1.11E+00 |
| FILT         | FzPz           | BL     | vs | Task_2 | 0.006 | 0.016* | -8.82E-01 |
| FILT         | FzPz           | BL     | vs | Task_3 | 0.008 | 0.016* | -8.37E-01 |
| FILT         | FzPz           | Task_1 | vs | Task_2 | 0.052 | 0.078  | 2.24E-01  |
| FILT         | FzPz           | Task_1 | vs | Task_3 | 0.081 | 0.097  | 2.70E-01  |
| FILT         | FzPz           | Task_2 | vs | Task_3 | 0.56  | 0.56   | 4.56E-02  |
| FILT+ASR     | FzPz           | BL     | vs | Task_1 | 0.007 | 0.03*  | -8.76E-01 |
| FILT+ASR     | FzPz           | BL     | vs | Task_2 | 0.02  | 0.03*  | -6.11E-01 |
| FILT+ASR     | FzPz           | BL     | vs | Task_3 | 0.043 | 0.051  | -5.18E-01 |
| FILT+ASR     | FzPz           | Task_1 | vs | Task_2 | 0.017 | 0.03*  | 2.65E-01  |
| FILT+ASR     | FzPz           | Task_1 | vs | Task_3 | 0.013 | 0.03*  | 3.58E-01  |
| FILT+ASR     | FzPz           | Task_2 | vs | Task_3 | 0.195 | 0.195  | 9.33E-02  |
| FILT+ASR+ICA | FzPz           | BL     | vs | Task_1 | 0.002 | 0.011* | -8.51E-01 |
| FILT+ASR+ICA | FzPz           | BL     | vs | Task_2 | 0.004 | 0.012* | -5.79E-01 |
| FILT+ASR+ICA | FzPz           | BL     | vs | Task_3 | 0.016 | 0.021* | -4.92E-01 |
| FILT+ASR+ICA | FzPz           | Task_1 | vs | Task_2 | 0.017 | 0.021* | 2.72E-01  |
| FILT+ASR+ICA | FzPz           | Task_1 | vs | Task_3 | 0.012 | 0.021* | 3.59E-01  |
| FILT+ASR+ICA | FzPz           | Task_2 | vs | Task_3 | 0.139 | 0.139  | 8.67E-02  |
| FILT+ICA     | FzPz           | BL     | vs | Task_1 | 0.004 | 0.021* | -8.25E-01 |
| FILT+ICA     | FzPz           | BL     | vs | Task_2 | 0.007 | 0.021* | -5.82E-01 |
| FILT+ICA     | FzPz           | BL     | vs | Task_3 | 0.017 | 0.035* | -5.15E-01 |
| FILT+ICA     | FzPz           | Task_1 | vs | Task_2 | 0.029 | 0.035* | 2.42E-01  |
| FILT+ICA     | FzPz           | Task_1 | vs | Task_3 | 0.023 | 0.035* | 3.09E-01  |
| FILT+ICA     | FzPz           | Task_2 | vs | Task_3 | 0.231 | 0.231  | 6.70E-02  |

---

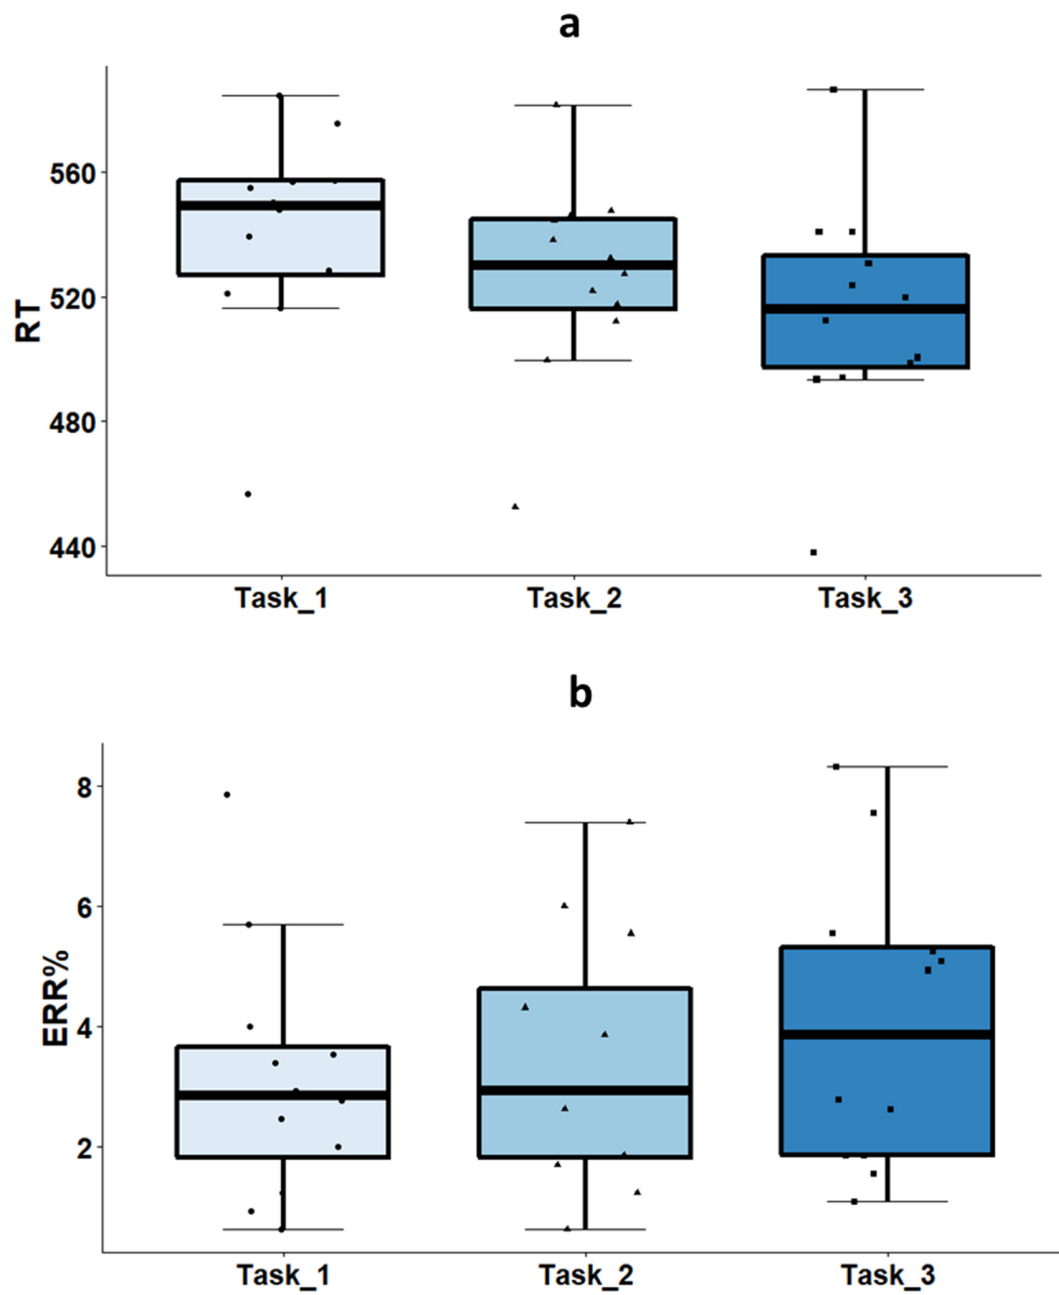

**Figure S1.** Subjects' Performances (n=12) assessed during the three blocks of the Simon Task. Boxplots show Reaction Times (RT) in the upper panel (a) and Error Rates (ERR%) in the lower panel (b).
